# Supplementary material
Source: HighWire-hosted journal article supplement (https://adc.bmj.com/content/108/3/225)
Supplement: inline-supplementary-material-3 [file inline-supplementary-material-3.pdf]

| Author / Date  | Title                                                                                                                                   | Was there a clear statement of the aims of the research? | Is a qualitative methodology appropriate? | Was the research design appropriate to address the aims of the research? | Was the recruitment strategy appropriate to the aims of the research? | Was the data collected in a way that addressed the research issue? | Has the relationship between researcher and participants been adequately considered? | Have ethical issues been taken into consideration? | Was the data analysis sufficiently rigorous? | Is there a clear statement of findings? | How valuable is the research? |
|----------------|-----------------------------------------------------------------------------------------------------------------------------------------|----------------------------------------------------------|-------------------------------------------|--------------------------------------------------------------------------|-----------------------------------------------------------------------|--------------------------------------------------------------------|--------------------------------------------------------------------------------------|----------------------------------------------------|----------------------------------------------|-----------------------------------------|-------------------------------|
| An 2019        | Difficulty in returning to school among adolescent leukemia survivors: A qualitative descriptive study                                  | Yes                                                      | Yes                                       | Yes                                                                      | Yes                                                                   | Yes                                                                | No                                                                                   | No                                                 | Yes                                          | Yes                                     | Yes                           |
| Bessell 2001   | Children surviving cancer: Psychosocial adjustment, quality of life, and school experiences                                             | Yes                                                      | Yes                                       | Yes                                                                      | Yes                                                                   | Yes                                                                | No                                                                                   | No                                                 | Yes                                          | Yes                                     | Yes                           |
| Cameron 2019   | The psychosocial interactions of Adolescent and Young Adult (AYA) cancer survivors and the possible relationship with their development | Yes                                                      | Yes                                       | Yes                                                                      | Yes                                                                   | Yes                                                                | Yes                                                                                  | Yes                                                | Yes                                          | Yes                                     | Yes                           |
| Christian 1997 | The child's eye: memories of growing up with cystic fibrosis                                                                            | Yes                                                      | Yes                                       | Yes                                                                      | Yes                                                                   | Yes                                                                | Yes                                                                                  | No                                                 | Yes                                          | Yes                                     | Yes                           |
| Cotter 2016    | The journey through school for children with cystic fibrosis : an interpretive phenomenological analysis                                | Yes                                                      | Yes                                       | Yes                                                                      | Yes                                                                   | Yes                                                                | Unsure                                                                               | Yes                                                | Yes                                          | Unsure                                  | Yes                           |

|                 |                                                                                                                               |        |     |     |        |     |     |     |     |        |     |
|-----------------|-------------------------------------------------------------------------------------------------------------------------------|--------|-----|-----|--------|-----|-----|-----|-----|--------|-----|
| D'Auria 2000    | The company they keep: the influence of peer relationships on adjustment to cystic fibrosis during adolescence                | Yes    | Yes | Yes | Unsure | Yes | No  | Yes | Yes | Yes    | Yes |
| Dockett 2004    | "Everyone was really happy to see me!" The importance of friendships in the return to school of children with chronic illness | Unsure | Yes | Yes | Yes    | Yes | No  | No  | Yes | Yes    | Yes |
| Ferguson 2014   | 'Getting on with life': resilience and normalcy in adolescents living with chronic illness                                    | Yes    | Yes | Yes | Unsure | Yes | No  | No  | Yes | Yes    | Yes |
| Fleischman 2011 | Experiences of Adolescents with Type 1 Diabetes as They Transition from Middle School to High School                          | Yes    | Yes | Yes | Yes    | Yes | Yes | No  | Yes | Yes    | Yes |
| Forgeron 2013   | Living with difference: Challenges to friendships for adolescents with pain                                                   | Yes    | Yes | Yes | Yes    | Yes | Yes | Yes | Yes | Yes    | Yes |
| Fottland 2000   | Childhood Cancer and the Interplay between Illness, Self-evaluation and Academic Experiences                                  | Yes    | Yes | Yes | Unsure | Yes | No  | No  | Yes | Unsure | Yes |

|                 |                                                                                                                                         |     |     |     |        |     |        |     |     |        |     |
|-----------------|-----------------------------------------------------------------------------------------------------------------------------------------|-----|-----|-----|--------|-----|--------|-----|-----|--------|-----|
| Gabe 2002       | Living with asthma: The experiences of young people at home and at school                                                               | Yes | Yes | Yes | Yes    | Yes | No     | Yes | Yes | Unsure | Yes |
| Gathercole 2017 | The educational experiences of children with cystic fibrosis                                                                            | Yes | Yes | Yes | Yes    | Yes | Yes    | Yes | Yes | Yes    | Yes |
| Glasson 1995    | A descriptive and exploratory pilot study into school re-entrance for adolescents who have received treatment for cancer                | Yes | Yes | Yes | Unsure | Yes | No     | Yes | Yes | Unsure | Yes |
| Holley 2018     | Barriers and facilitators to self-management of asthma in adolescents: An interview study to inform development of a novel intervention | Yes | Yes | Yes | Yes    | Yes | Unsure | Yes | Yes | Yes    | Yes |
| Holmstrom 2021  | The lived experiences of young people living with type 1 diabetes: A hermeneutic study                                                  | Yes | Yes | Yes | Yes    | Yes | Yes    | Yes | Yes | Yes    | Yes |
| Kime 2014       | “Join us on our journey”: exploring the experiences of children and young people with type 1 diabetes and their parents                 | Yes | Yes | Yes | Yes    | Yes | No     | Yes | Yes | Unsure | Yes |

|                |                                                                                                                                                      |     |     |     |        |     |     |     |     |     |     |
|----------------|------------------------------------------------------------------------------------------------------------------------------------------------------|-----|-----|-----|--------|-----|-----|-----|-----|-----|-----|
| Kuntz 2019     | Pediatric Cancer Patients' Treatment Journey: Child, Adolescent, and Young Adult Cancer Narratives                                                   | Yes | Yes | Yes | Yes    | Yes | Yes | Yes | Yes | Yes | Yes |
| Kyngas 2004    | Support network of adolescents with chronic disease: adolescents' perspective                                                                        | Yes | Yes | Yes | Unsure | Yes | No  | Yes | Yes | Yes | Yes |
| Lakeman 2021   | The school experiences of young people with a chronic health condition : an interpretative phenomenological analysis                                 | Yes | Yes | Yes | Yes    | Yes | Yes | Yes | Yes | Yes | Yes |
| Li 2013        | The impact of cancer on the physical, psychological and social well-being of childhood cancer survivors                                              | Yes | Yes | Yes | Unsure | Yes | No  | Yes | Yes | Yes | Yes |
| Lightfoot 1999 | Supporting pupils in mainstream school with an illness or disability: young people's views                                                           | No  | Yes | Yes | Yes    | Yes | No  | No  | Yes | Yes | Yes |
| MacMillan 2015 | Supporting Participation in Physical Education at School in Youth with Type 1 Diabetes: Perceptions of Teachers, Youth with Type 1 Diabetes, Parents | Yes | Yes | Yes | Yes    | Yes | Yes | Yes | Yes | Yes | Yes |

|               |                                                                                                                                         |        |     |     |     |     |        |     |     |     |     |
|---------------|-----------------------------------------------------------------------------------------------------------------------------------------|--------|-----|-----|-----|-----|--------|-----|-----|-----|-----|
|               | and Diabetes Professionals                                                                                                              |        |     |     |     |     |        |     |     |     |     |
| Newbould 2007 | Young people's experiences of managing asthma and diabetes at school                                                                    | Yes    | Yes | Yes | Yes | Yes | No     | Yes | Yes | Yes | Yes |
| Pini 2016     | How teenagers continue school after a diagnosis of cancer: experiences of young people and recommendations for practice                 | Yes    | Yes | Yes | Yes | Yes | No     | Yes | Yes | Yes | Yes |
| Pini 2019     | 'What are you crying for? I don't even know you' - The experiences of teenagers communicating with their peers when returning to school | Yes    | Yes | Yes | Yes | Yes | Unsure | Yes | Yes | Yes | Yes |
| Pini 2019     | How and Why School Is Important to Teenagers with Cancer: Outcomes from a Photo-Elicitation Study                                       | Unsure | Yes | Yes | Yes | Yes | Yes    | Yes | Yes | Yes | Yes |
| Ragni 2020    | The impact of epilepsy on adolescence: a quali-quantitative                                                                             | Yes    | Yes | Yes | Yes | Yes | No     | Yes | Yes | Yes | Yes |

|                   |                                                                                                                                                    |     |     |     |     |     |        |        |     |     |     |
|-------------------|----------------------------------------------------------------------------------------------------------------------------------------------------|-----|-----|-----|-----|-----|--------|--------|-----|-----|-----|
|                   | investigation using focus group                                                                                                                    |     |     |     |     |     |        |        |     |     |     |
| Rennick&Lee 2015  | Back to School After Cancer Treatment: Making Sense of the Adolescent Experience                                                                   | Yes | Yes | Yes | Yes | Yes | Unsure | Yes    | Yes | Yes | Yes |
| Secor-Turner 2011 | Living With Juvenile Arthritis: Adolescents' Challenges and Experiences                                                                            | Yes | Yes | Yes | Yes | Yes | Yes    | Yes    | Yes | Yes | Yes |
| Vera 2015         | The lived experience of pain in adolescents diagnosed with cystic fibrosis                                                                         | Yes | Yes | Yes | Yes | Yes | Yes    | Yes    | Yes | Yes | Yes |
| Wakefield 2021    | "If it ever really hurts, I try not to let them know:" The use of concealment as a coping strategy among adolescents with Chronic Pain             | Yes | Yes | Yes | Yes | Yes | Yes    | Yes    | Yes | Yes | Yes |
| Wilkie 2012       | "Absence Makes the Heart Grow Fonder": Students with Chronic Illness Seeking Academic Continuity through Interaction with Their Teachers at School | Yes | Yes | Yes | Yes | Yes | No     | Unsure | Yes | Yes | Yes |

|             |                                                                                                                           |     |     |        |     |     |    |        |        |     |     |
|-------------|---------------------------------------------------------------------------------------------------------------------------|-----|-----|--------|-----|-----|----|--------|--------|-----|-----|
| Winger 2014 | 'Sometimes it feels as if the world goes on without me': adolescents' experiences of living with chronic fatigue syndrome | Yes | Yes | Yes    | Yes | Yes | No | Yes    | Yes    | Yes | Yes |
| Zhu 2015    | Using an ICT tool as a solution for the educational and social needs of long-term sick adolescents                        | Yes | Yes | Unsure | Yes | Yes | No | Unsure | Unsure | Yes | Yes |
